# Supplementary material for: Serendipitous syntheses and structures of [Cp2Nb(H){(SiMe2)2(µ-NR)}]Electronic supplementary information (ESI) available: experimental section. Fig. 1S and Table 1S. See http://www.rsc.org/suppdata/cc/b1/b111636c/ Dedicated to Prof. Dr J. Lorberth on the occasion of his 65th birthday.
Source: Royal Society of Chemistry journal article supplement (doi:10.1039/b111636c), 2002-02-15
Supplement: b111636c.doc [file b111636c.doc]

# Supplementary Information

**Experimental Section**

Description of general experimental techniques can be found in ref. 8a.

**Preparation of Cp2Nb{(SiMe2)2(-NBut}(H) (4):** To a solution of Cp2Nb(SiIMe2)2(H) (**6**) (.30 g, .51 mmol) in ether (30 mL) was added H2NBut (0.5 mL, 10 equivs). The mixture was stirred two days. The solution was filtered and the residue washed by ether (10 mL). Volatiles were *in vacuo* removed from combined fractions to give **4** in 0.20 g yield (95 %). Keeping ether solution at –26 C produces **4** in form of well-shaped yellow crystals.

IR (Nujol): 1757 cm‑1 (Nb-H). -7.79 (s, 1 H; Nb–H), 0.52 (s, 6 H; SiMe2), 0.62 (s, *6* H; SiMe2), 1.32 (s, 9 H; C(CH3)3), 4.48 (s, 10 H; Cp).  13C NMR ([D6]benzene): 87.43 (s, Cp), 57.20 (s, C(CH3)3), 34.03 (s, C(CH3)3), 12.05 (SiMe2), 11.11 (SiMe2).

C18H32NNbSi2(411.537):calcd C 52.53, H 7.84, N 3.40; found C 52.30, H 7.99, N 3.40.

**2. Preparation of Cp2Nb{(SiMe2)2(-NEt}(H) (5):** To a solution of **6** (.49 g, .82 mmol) in ether (30 mL) was added HNEt2 (1 mL, excess). The mixture was stirred two days. The solution was filtered and the residue washed by ether (30 mL). Volatiles were *in vacuo* removed from combined fractions to give **5** in 0.10 g isolated yield (32 %).1H NMR ([D6]benzene): -8.11 (s, 1 H; Nb–H), 0.38 (s, 6 H; SiMe2), 0.49 (s, *6* H; SiMe2), 0.97 (t, *J*(H-H) = 6.9 Hz, 3 H; CH2CH3), 1.17 (t, *J* (H-H) = 7.0 Hz, 3 H; CH2CH3), 2.47 (q, *J* (H-H) = 6.8 Hz, 2 H; CH2Me), 2.97 (q, *J* (H-H) = 7.0 Hz, 2 H; CH2Me), 4.48 (s, 10 H; Cp). C16H28NNbSi2(383.483):calcd C 50.11, H 7.36,N 3.65; found C 50.01, H 7.48, N 3.38.

Figure 1S. Calculated geometries of **8** and **10**.

Si(2)

Si(1)

N(1)

Nb(1)

**10**

**8**

Table 1S. Selected structural parameters for complexes **4**, **8**, **9**, **10**. Bond lengths in (Å), bond angles in (°).

| Complex | Nb–Si(1) | Nb–Si(2) | Si(1)–N | Si(2)–N | Nb–H | Si(2)H | Si(1)–Si(2) | Si(1)–Nb–Si(2) | Nb–Si(1)–N | Si(1)–N–Si(2) |
| --- | --- | --- | --- | --- | --- | --- | --- | --- | --- | --- |
| **4** a | 2.685(1) | 2.680(2) | 1.757(6) | 1.757(6) | 1.89, c  1.79 | 2.26, c  1.96 | 2.654(2) | 59.29(4) | 101.25(21) | 98.11(30) |
| **8** b | 2.588 | 2.539 | 1.756 | 1.761 | 1.780 | 2.080 | 2.654 | 62.3 | 99.0 | 98.0 |
| **9** b | 2.610 | 2.566 | 1.759 | 1.760 | 1.771 | 2.067 | 2.653 | 61.6 | 99.4 | 97.8 |
| **10** b | 2.565 | 2.553 | 1.774 | 1.809 | 1.771 | 2.029 | 3.146 | 75.8 | 117.1 | — |

a X-ray diffraction data

b DFT calculation data

c for two disordered position
